# Supplementary material for: Tramiprosate, a drug of potential interest for the treatment of Alzheimer's disease, promotes an abnormal aggregation of tau
Source: PubMed Central journal article supplement (PMC2048960; doi:10.1186/1750-1326-2-17), 2007-09-06

**A**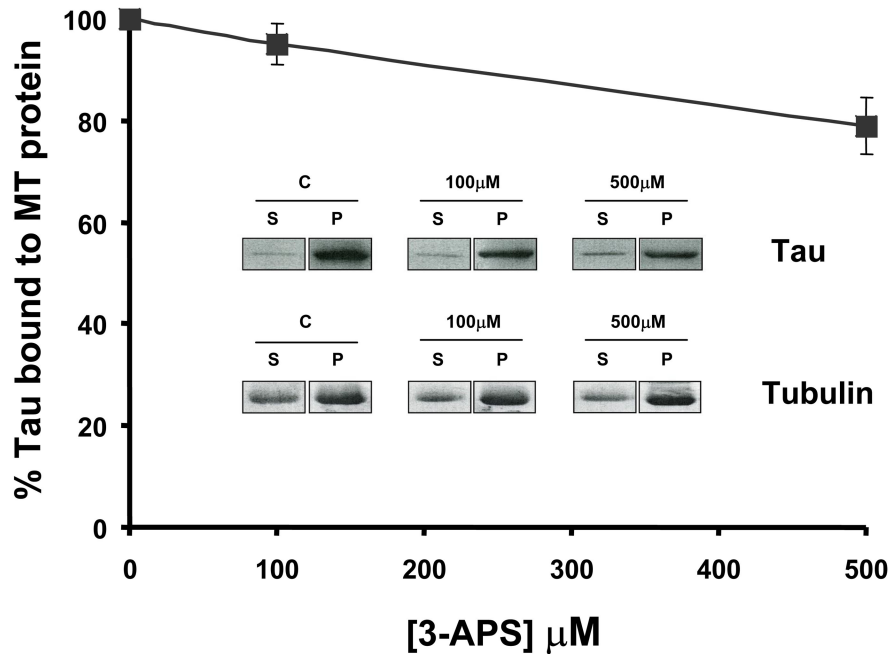

Supplement: 1750-1326-2-17-S1.pdf [file 1750-1326-2-17-S1.pdf]
